# Supplementary material
Source: PubMed Central journal article supplement (PMC6261316)

**HE Golden et al. Supporting Information**

**WebFigure 1.** Modeled data can provide varying degrees of GIW connectivity information for different connectivity flowpath types. Information provided by models can range in spatial detail from implicit (eg spatially lumped model; no connectivity represented; assumed similar at watershed scale) to fully explicit (fully distributed model; each GIW’s connectivity flowpath is measured or modeled individually). Examples of connectivity information derived from hydrologic models are included here (acronyms and information detailed in WebTable 3).

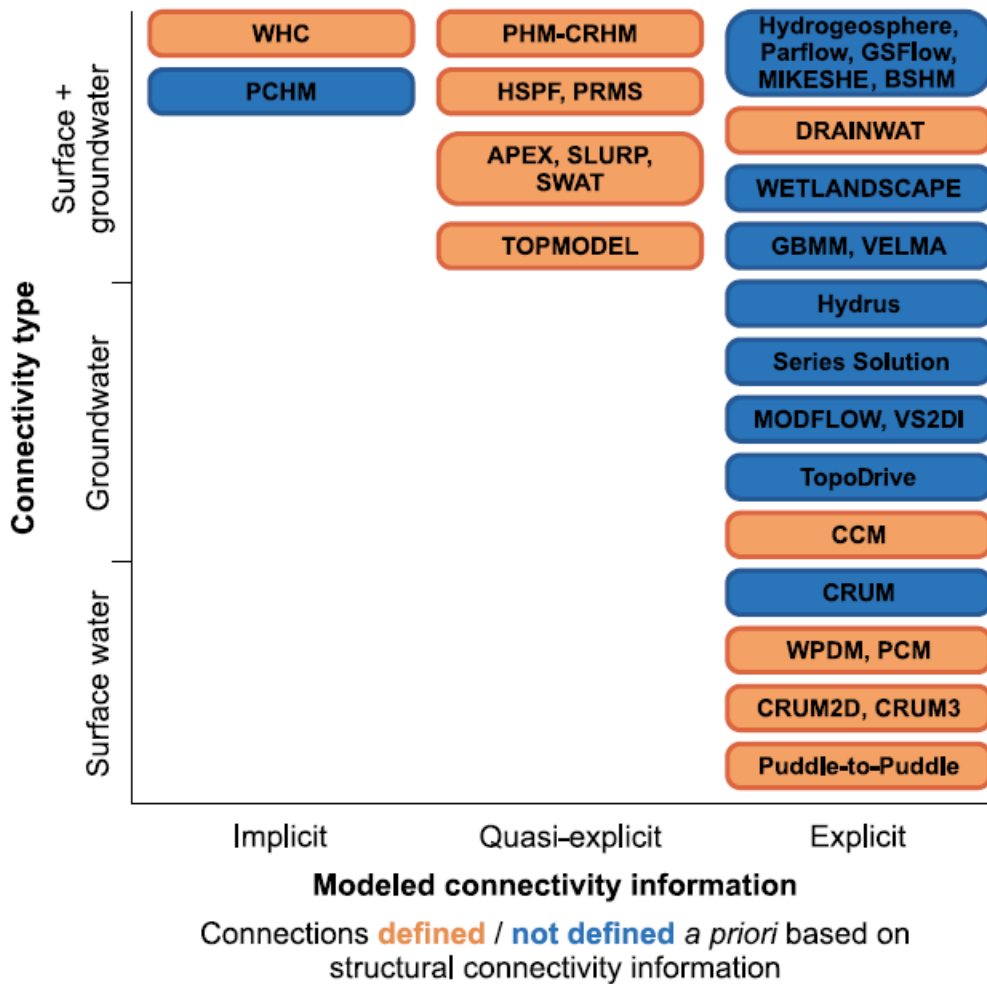

Supplement: NIHMS983358-supplement-Web_Figure_S1.pdf [file NIHMS983358-supplement-Web_Figure_S1.pdf]
