# Supplementary material
Source: PubMed Central journal article supplement (PMC6261316)
Supplement: NIHMS983358-supplement-Web_Table_S1.pdf [file NIHMS983358-supplement-Web_Table_S1.pdf]

**HE Golden *et al.* – Supplemental Information**

**WebTable 1. Example definitions of hydrologic connectivity.** Structural connectivity uses the spatial relationships between landscape units to infer potential water movement. Functional connectivity quantifies actual water movement across the landscape. SW: surface water. GW: groundwater. Required level of spatial detail refers to the size and shape of the spatial units that comprise the model and within which model equations are calculated. This level of spatial detail ranges from low (eg spatially lumped model) to high (ie a fully distributed model).

| <i>Definition of hydrologic connectivity</i>                                                                      | <i>Associated measurement &amp; modeling decisions</i> |                                      |                                         |                                                                                                                               |
|-------------------------------------------------------------------------------------------------------------------|--------------------------------------------------------|--------------------------------------|-----------------------------------------|-------------------------------------------------------------------------------------------------------------------------------|
|                                                                                                                   | <i>Target connectivity type</i>                        | <i>Assumed dominant flow type(s)</i> | <i>Required level of spatial detail</i> | <i>References</i>                                                                                                             |
| Physical coupling between discrete units of the landscape: notably, upland and riparian zones                     | Structural                                             | SW                                   | Low to high                             | Stieglitz <i>et al.</i> 2003; Lane <i>et al.</i> 2004; Bracken <i>et al.</i> 2007                                             |
| Degree to which water moves through a system                                                                      | Functional                                             | SW and/or GW                         | Low to high                             | Pringle 2003; Tetzlaff <i>et al.</i> 2007                                                                                     |
| Large-scale hydrological behavior arising from the concurrent activation of small-scale flow generation processes | Functional                                             | SW and/or GW                         | High                                    | Bracken <i>et al.</i> 2013                                                                                                    |
| Condition by which disparate regions in upland and riparian zones are linked via lateral subsurface water flow    | Structural, Functional                                 | GW                                   | Medium to high                          | Hornberger <i>et al.</i> 1994; Creed and Band 1998; Vidon and Hill 2004; Ocampo <i>et al.</i> 2006; Jencso <i>et al.</i> 2009 |

| <i>Definition of hydrologic connectivity</i>                                                              | <i>Associated measurement &amp; modeling decisions</i> |                                      |                                         |                                                                                                 |
|-----------------------------------------------------------------------------------------------------------|--------------------------------------------------------|--------------------------------------|-----------------------------------------|-------------------------------------------------------------------------------------------------|
|                                                                                                           | <i>Target connectivity type</i>                        | <i>Assumed dominant flow type(s)</i> | <i>Required level of spatial detail</i> | <i>References</i>                                                                               |
| Hydrologically relevant spatial patterns of watershed properties that facilitate water flow and transport | Structural, Functional                                 | SW and/or GW                         | Medium to high                          | Western <i>et al.</i> 2001; James and Roulet 2007; Antoine <i>et al.</i> 2009; Ali and Roy 2010 |
| Condition by which spatially contiguous features concentrate flow and reduce travel times                 | Structural, Functional                                 | SW and/or GW                         | High                                    | Knudby and Carrera 2005                                                                         |

## WebReferences

- Ali GA and Roy AG. 2010. Shopping for hydrologically representative connectivity metrics in a humid temperate forested catchment. *Water Resour Res* **46**; doi:10.1029/2010WR009442.
- Antoine M, Javaux M, and Bielders C. 2009. What indicators can capture runoff relevant connectivity properties of the micro-topography at the plot scale? *Adv Water Resour* **32**: 1297–310.
- Bracken LJ and Croke J. 2007. The concept of hydrological connectivity and its contribution to understanding runoff dominated geomorphic systems. *Hydrol Processes* **21**: 1749–63.
- Bracken LJ, Wainwright J, Ali GA, *et al.* 2013. Concepts of hydrological connectivity: research approaches, pathways and future agendas. *Earth-Sci Rev* **119**: 17–34.
- Creed IF and Band LE. 1998. Exploring functional similarity in the export of nitrate-N from forested catchments: a mechanistic modeling approach. *Water Resour Res* **34**: 3079–93.
- Hornberger GM, Bencala KE, and McKnight DM. 1994. Hydrological controls on the temporal variation of dissolved organic carbon in the Snake River near Montezuma, Colorado. *Biogeochem* **25**: 147–65.
- James AL and Roulet NT. 2007. Investigating hydrologic connectivity and its association with threshold change in runoff response in a temperate forested watershed. *Hydrol Processes* **21**: 3391–408.
- Jencso KG, McGlynn BL, Gooseff MN, *et al.* 2009. Hydrologic connectivity between landscapes and streams: Transferring reach- and plot-scale understanding to the catchment scale. *Water Resour Res* **45**; doi:10.1029/2008WR007225.
- Knudby C and Carrera J. 2005. On the relationship between indicators of geostatistical, flow and transport connectivity. *Adv Water Resour* **28**: 405–21.
- Lane SN, Brookes CJ, Kirkby MJ, *et al.* 2004. A network-index based version of TOPMODEL for use with high-resolution digital topographic data. *Hydrol Processes* **18**: 191–201.
- Ocampo CJ, Sivapalan M, and Oldham C. 2006. Hydrological connectivity of upland-riparian zones in agricultural catchments: implications for runoff generation and nitrate transport. *J Hydrol* **331**: 643–58.
- Pringle C. 2003. What is hydrologic connectivity and why is it ecologically important? *Hydrol Processes* **17**: 2685–89.
- Stieglitz M, Shaman J, McNamara J, *et al.* 2003. An approach to understanding hydrologic connectivity on the hillslope and the implications for nutrient transport. *Glob Biogeochem Cycles* **17**; doi:10.1029/2003GB002041.
- Tetzlaff D, Soulsby C, Bacon PJ, *et al.* 2007. Connectivity between landscapes and riverscapes – a unifying theme in integrating hydrology and ecology in catchment science? *Hydrol Processes* **21**: 1385–89.
- Vidon PGF and Hill AR. 2004. Landscape controls on the hydrology of stream riparian zones. *J Hydrol* **292**: 210–28.
- Western AW, Blöschl G, and Grayson RB. 2001. Toward capturing hydrologically significant connectivity in spatial patterns. *Water Resour Res* **37**: 83–97.
