# Supplementary material
Source: PubMed Central journal article supplement (PMC6261316)
Supplement: NIHMS983358-supplement-Web_Table_S2.pdf [file NIHMS983358-supplement-Web_Table_S2.pdf]

**HE Golden *et al.* – Supporting Information**

**WebTable 2. Inventory of measurements for quantifying GIW connectivity or its downstream effects.** The table is organized by watershed properties. This table is not intended to be comprehensive but to provide examples of appropriate and relevant measurements. Wetland parameterization means that model parameters or equations are specific to wetlands (eg wetland water depths).

| <i>Watershed property</i>            | <i>Available measurement technologies for watershed property</i>                                              | <i>Associated connectivity properties</i>                                        |
|--------------------------------------|---------------------------------------------------------------------------------------------------------------|----------------------------------------------------------------------------------|
| <b><i>Climate</i></b>                | Climate databases or maps (in-situ and remotely sensed)                                                       | Spatial extent<br>Magnitude<br>Timing<br>Duration<br>Frequency<br>Rate of change |
|                                      | In-situ long-term meteorological station data                                                                 |                                                                                  |
| <b><i>Elevation</i></b>              | Photogrammetry                                                                                                |                                                                                  |
|                                      | Interferometric synthetic aperture radar (SAR)                                                                | Spatial extent                                                                   |
|                                      | Light and Detection Ranging (LiDAR)                                                                           |                                                                                  |
| <b><i>Land use/land cover</i></b>    | Remote-sensing images (eg aerial photographs, multispectral, hyperspectral, RADAR)                            | Spatial extent                                                                   |
| <b><i>Soil/surficial geology</i></b> | Soil databases or maps (in-situ and remotely sensed)                                                          | Spatial extent                                                                   |
|                                      | In-situ soil cores                                                                                            |                                                                                  |
| <b><i>Soil saturation</i></b>        | Soil databases or maps (in-situ and remotely sensed)                                                          | Spatial extent<br>Magnitude                                                      |
|                                      | In-situ soil moisture monitoring (eg time-domain reflectometry probes, frequency-domain reflectometry probes) | Timing                                                                           |

| <i>Watershed property</i>              | <i>Available measurement technologies for watershed property</i>                                                                                           | <i>Associated connectivity properties</i>         |
|----------------------------------------|------------------------------------------------------------------------------------------------------------------------------------------------------------|---------------------------------------------------|
|                                        | Remote-sensing images (eg RADAR)                                                                                                                           | Duration<br>Frequency<br>Rate of change           |
| <b><i>Surface water inundation</i></b> | Remote-sensing images (eg SPOT, LANDSAT, etc)                                                                                                              | Spatial extent<br>Magnitude                       |
|                                        | In-situ monitoring of wetland stage (eg stilling wells equipped with pressure transducers or capacitance probes) and connections with other surface waters | Timing<br>Duration<br>Frequency<br>Rate of change |
|                                        | In-situ water table monitoring (eg shallow and deep wells equipped with pressure transducers or capacitance probes)                                        | Spatial extent<br>Magnitude                       |
| <b><i>Groundwater</i></b>              |                                                                                                                                                            | Timing<br>Duration                                |
|                                        | Remote-sensing images (eg elevation data interpreted as surface expression of the groundwater table)                                                       | Frequency<br>Rate of change                       |
| <b><i>Stream discharge</i></b>         |                                                                                                                                                            | Magnitude                                         |
|                                        | In-situ stream gauging (continuous stage data only)                                                                                                        | Duration                                          |

| <i>Watershed property</i>                                               | <i>Available measurement technologies for watershed property</i>                                                 | <i>Associated connectivity properties</i> |
|-------------------------------------------------------------------------|------------------------------------------------------------------------------------------------------------------|-------------------------------------------|
| <i>Connectivity type, ie surface versus groundwater (shallow, deep)</i> | In-situ stream gauging (continuous stage and flow velocity data)                                                 | Timing                                    |
|                                                                         | Remotely sensed inundation map                                                                                   | Frequency                                 |
|                                                                         |                                                                                                                  | Flow partitioning                         |
|                                                                         |                                                                                                                  | Rate of change                            |
|                                                                         |                                                                                                                  |                                           |
|                                                                         | In-situ geochemical tracer data (eg chloride concentrations, specific conductance)                               | Magnitude                                 |
|                                                                         | In-situ isotopic tracer data (eg stable water isotopes)                                                          | Duration                                  |
|                                                                         |                                                                                                                  | Timing                                    |
|                                                                         | In-situ monitoring of wetland stage (eg stilling wells equipped with pressure transducers or capacitance probes) | Frequency                                 |
|                                                                         |                                                                                                                  | Rate of change                            |
| Flow partitioning                                                       |                                                                                                                  |                                           |
| Flow modeling using digital elevation models                            |                                                                                                                  |                                           |
