# Supplementary material
Source: PubMed Central journal article supplement (PMC6261316)
Supplement: NIHMS983358-supplement-Web_Table_S3.pdf [file NIHMS983358-supplement-Web_Table_S3.pdf]

## HE Golden *et al.* Supporting Information

**WebTable 3.** Inventory of models for quantifying GIW connectivity or their downstream effects. The table is organized by model type. This table is not intended to be comprehensive but to provide examples of appropriate and relevant models. Most of the models presented here are process-based. Others, such as SWAT, are semi-processed based, which means they have a combination of physical processes and embedded empirical (eg statistical) relationships. Wetland parameterization means that model parameters or equations are specific to wetlands (eg wetland water depths).

| <b>Model type</b> | <b>Model name</b> | <b>Flowpath type</b> | <b>Structural connectivity information as model input?</b> | <b>Wetland parameterization available?</b> | <b>Required input data and/or calibration data</b>                                      | <b>References</b>                                                        |
|-------------------|-------------------|----------------------|------------------------------------------------------------|--------------------------------------------|-----------------------------------------------------------------------------------------|--------------------------------------------------------------------------|
| Fully distributed | Hydrogeosphere    | SW and GW            | No                                                         | Yes                                        | Elevation, soil/surficial geology, stream discharge + weather data                      | Therrien <i>et al.</i> 2008                                              |
| Fully distributed | Parflow           | SW and GW            | No                                                         | Yes                                        | Elevation, soil/surficial geology, stream discharge + weather data                      | Ashby and Falgout 1996; Jones and Woodward 2001; Kollet and Maxwell 2006 |
| Fully distributed | GSFlow            | SW and GW            | No                                                         | Yes                                        | Elevation, land use/land cover, soil/surficial geology, stream discharge + weather data | Markstrom <i>et al.</i> 2008                                             |
| Fully distributed | MIKESHE           | SW and GW            | No                                                         | Yes                                        | Elevation, land use/land cover, soil/surficial geology, stream discharge + weather data | Refsgaard and Storm 1995                                                 |

| <b>Model type</b> | <b>Model name</b>                                                               | <b>Flowpath type</b> | <b>Structural connectivity information as model input?</b> | <b>Wetland parameterization available?</b> | <b>Required input data and/or calibration data</b>                        | <b>References</b>                      |
|-------------------|---------------------------------------------------------------------------------|----------------------|------------------------------------------------------------|--------------------------------------------|---------------------------------------------------------------------------|----------------------------------------|
| Fully distributed | Hydrus                                                                          | GW                   | No                                                         | Yes                                        | Soil/surficial geology, water table depth or soil moisture + weather data | Simunek <i>et al.</i> 2006             |
| Fully distributed | Series Solution                                                                 | GW                   | No                                                         | Yes                                        | Elevation, soil/surficial geology, stream discharge + weather data        | Ameli and Craig 2014                   |
| Fully distributed | Puddle to puddle model (P2P)                                                    | SW                   | Yes                                                        | Yes                                        | Elevation, soil/surficial geology + weather data                          | Chu <i>et al.</i> 2013                 |
| Fully distributed | Connectivity of runoff model (CRUM, agent-based version)                        | SW                   | No                                                         | No                                         | Elevation, stream discharge + weather data                                | Reaney <i>et al.</i> 2007; Reaney 2008 |
| Fully distributed | Connectivity of runoff model (versions CRUM2D and CRUM3 based on network index) | SW                   | Yes                                                        | No                                         | Elevation, stream discharge + weather data                                | Lane <i>et al.</i> 2009                |

| <b>Model type</b> | <b>Model name</b>                                             | <b>Flowpath type</b> | <b>Structural connectivity information as model input?</b> | <b>Wetland parameterization available?</b> | <b>Required input data and/or calibration data</b>                                      | <b>References</b>                                       |
|-------------------|---------------------------------------------------------------|----------------------|------------------------------------------------------------|--------------------------------------------|-----------------------------------------------------------------------------------------|---------------------------------------------------------|
| Fully distributed | DRAINMOD for Watershed (DRAINWAT)                             | SW and GW            | Yes                                                        | No                                         | Land use/land cover, soil/surficial geology, stream discharge + weather data            | Skaggs 1978; Amatya 1993; Amatya <i>et al.</i> 1997     |
| Fully distributed | Visualizing Ecosystems for Land Management Assessment (VELMA) | SW and GW            | No                                                         | Yes                                        | Elevation, soil/surficial geology, stream discharge + weather data                      | Abdelnour <i>et al.</i> 2011; Golden <i>et al.</i> 2014 |
| Fully distributed | VS2DI                                                         | GW                   | No                                                         | Yes                                        | Elevation, soil/surficial geology, water table depth + weather data                     | Hsieh <i>et al.</i> 2000                                |
| Fully distributed | MODFLOW                                                       | GW                   | No                                                         | Yes                                        | Elevation, soil/surficial geology, water table depth + weather data                     | Harbaugh 2005                                           |
| Fully distributed | Basin-Scale Hydrologic Model (BSHM)                           | SW and GW            | No                                                         | Yes                                        | Elevation, land use/land cover, soil/surficial geology, stream discharge + weather data | Yu and Schwartz 1998                                    |
| Fully distributed | WETLANDSCAPE (WLS) (successor to WETSIM)                      | SW and GW            | No                                                         | Yes                                        | Elevation (including wetland bathymetry), stream discharge + weather data               | Johnson <i>et al.</i> 2010                              |

| <b>Model type</b> | <b>Model name</b>                                                         | <b>Flowpath type</b> | <b>Structural connectivity information as model input?</b> | <b>Wetland parameterization available?</b> | <b>Required input data and/or calibration data</b>                                      | <b>References</b>                                                           |
|-------------------|---------------------------------------------------------------------------|----------------------|------------------------------------------------------------|--------------------------------------------|-----------------------------------------------------------------------------------------|-----------------------------------------------------------------------------|
| Fully distributed | TopoDrive                                                                 | GW                   | No                                                         | Yes                                        | Elevation, soil/surficial geology                                                       | Hsieh 2001                                                                  |
| Fully distributed | Wetland Digital Elevation Ponding Model (WDPM)                            | SW                   | Yes                                                        | Yes                                        | Elevation + weather data                                                                | Shook <i>et al.</i> 2013                                                    |
| Fully distributed | Pothole Cascade Model (PCM)                                               | SW                   | Yes                                                        | Yes                                        | Weather data (precipitation is forced onto synthetic wetlands)                          | Shook and Pomeroy 2011                                                      |
| Fully distributed | Catchment Connectivity Model (CCM)                                        | GW                   | Yes                                                        | No                                         | Elevation, stream discharge + weather data                                              | Jencso <i>et al.</i> 2009; Smith <i>et al.</i> 2013                         |
| Semi-distributed  | Prairie hydrological model-Cold Regions Hydrological Modelling (PHM-CRHM) | SW and GW            | Yes                                                        | Yes                                        | Elevation, land use/land cover + weather data                                           | Pomeroy <i>et al.</i> 2010; Fang <i>et al.</i> 2010; Guo <i>et al.</i> 2012 |
| Semi-distributed  | Hydrologic Simulation Program-FORTRAN (HSPF)                              | SW and GW            | Yes                                                        | Yes                                        | Elevation, land use/land cover, soil/surficial geology, stream discharge + weather data | Bicknell <i>et al.</i> 2001; Golden <i>et al.</i> 2014                      |

| <b>Model type</b> | <b>Model name</b>                                                    | <b>Flowpath type</b> | <b>Structural connectivity information as model input?</b> | <b>Wetland parameterization available?</b> | <b>Required input data and/or calibration data</b>                                                       | <b>References</b>                                                   |
|-------------------|----------------------------------------------------------------------|----------------------|------------------------------------------------------------|--------------------------------------------|----------------------------------------------------------------------------------------------------------|---------------------------------------------------------------------|
| Semi-distributed  | Original SWAT model                                                  | SW and GW            | Yes                                                        | Yes                                        | Elevation, land use/land cover, soil/surficial geology, stream discharge + weather data                  | Neitsch <i>et al.</i> 2005                                          |
| Semi-distributed  | SWAT model with hydrologic equivalent wetland (HEW) concept          | SW and GW            | Yes                                                        | Yes                                        | Elevation, land use/land cover, soil/surficial geology, stream discharge + weather data                  | Wang <i>et al.</i> 2008, 2010                                       |
| Semi-distributed  | SWAT with spatially distributed wetlands                             | SW and GW            | Yes                                                        | Yes                                        | Elevation, land use/land cover, soil/surficial geology, stream discharge + weather data                  | Evenson <i>et al.</i> 2015, 2016                                    |
| Semi-distributed  | SWAT with probability distributed landscape depressions (SWAT-PDLLD) | SW and GW            | Yes                                                        | Yes                                        | Elevation, land use/land cover, soil/surficial geology, stream discharge + weather data                  | Mekonnen <i>et al.</i> 2016                                         |
| Semi-distributed  | APEX (Agricultural Policy/Environmental eXtender)                    | SW and GW            | Yes                                                        | Yes                                        | Elevation, land use/land cover, soil/surficial geology, stream discharge and/or tile flow + weather data | Williams <i>et al.</i> 2005, 2006, 2008; Gassman <i>et al.</i> 2010 |
| Semi-distributed  | TOPMODEL                                                             | SW and GW            | Yes                                                        | No                                         | Elevation, stream discharge + weather data                                                               | Beven and Kirkby 1979                                               |

| Model type       | Model name                                               | Flowpath type | Structural connectivity information as model input? | Wetland parameterization available? | Required input data and/or calibration data                                                        | References                            |
|------------------|----------------------------------------------------------|---------------|-----------------------------------------------------|-------------------------------------|----------------------------------------------------------------------------------------------------|---------------------------------------|
| Semi-distributed | SLURP (Semi-distributed Land Use-based Runoff Processes) | SW and GW     | Yes                                                 | Yes                                 | Elevation, land use/land cover, soil/surficial geology, stream discharge + weather data            | Kite 1998; Su et al. 2000             |
| Semi-distributed | Precipitation-Runoff Modeling System (PRMS)              | SW and GW     | Yes                                                 | Yes                                 | Elevation, land use/land cover, soil/surficial geology, stream discharge + weather data            | Vining 2002; Viger <i>et al.</i> 2010 |
| Lumped           | Wetland Hydrologic Capacitance (WHC) model               | GW and SW     | Typically yes but optional                          | Yes                                 | Elevation, soil/surficial geology + weather data                                                   | McLaughlin <i>et al.</i> 2014         |
| Lumped           | Pothole Complex Hydrologic Model (PCHM)                  | SW and GW     | No                                                  | Yes                                 | Elevation (wetland bathymetry only), water table depth (i.e., wetland water levels) + weather data | Liu and Schwartz 2011                 |

## References

Abdelnour A, Stieglitz M, Pan F, et al. 2011. Catchment hydrological responses to forest harvest amount and spatial pattern. *Water Resour Res* **47**: W09521, doi:10.1029/2010WR010165.

Amatya DM. 1993. Hydrologic Modeling of Drained Forested Lands (Unpubl. Ph.D. dissertation). North Carolina State University, Raleigh, NC.

Amatya DM, Skaggs RW, and Gregory JD. 1997. Evaluation of a watershed scale forest hydrologic model. *J Agric Water Manag* **32**: 239-258.

Ameli AA and Craig JR. 2014. Semianalytical series solutions for three-dimensional groundwater-surface water interaction. *Water Resour Res* **50**: 3893-3906.

Ashby SF and Falgout RD. 1996. A parallel multigrid preconditioned conjugate gradient algorithm for groundwater flow simulations. *Nucl Sci Eng* **124**: 145-59.

Beven K and Kirkby M. 1979. A physically-based, variable contributing area model of basin hydrology. *Hydrol Sci Bull* **24**: 43-69.

Chu X, Yang J, Chi Y, et al. 2013. Dynamic puddle delineation and modeling of puddle-to-puddle filling-spilling-merging-splitting overland flow processes. *Water Resour Res* **49**: 3825-3829.

Evenson GR, Golden HE, Lane CR, D'Amico E. 2015. Geographically isolated wetlands and watershed hydrology: A modified model analysis. *J Hydrol* **529**: 240-256.

Evenson GR, Golden HE, Lane CR, et al. 2016. An improved representation of geographically isolated wetlands in a watershed-scale hydrologic model. *Hydrol Process* doi: 10.1002/hyp.10930.

Fang X, Pomeroy JW, Westbrook CJ, et al. 2010. Prediction of snowmelt derived streamflow in a wetland dominated prairie basin. *Hydrol Earth Syst Sci* **14**: 991-1006.

Gassman PW, Williams JR, Wang X, et al. 2010. Policy Environmental EXtender (APEX) Model: An Emerging Tool for Landscape and Watershed Environmental Analyses. *Trans ASABE* **53**: 711-740.

Golden HE, Lane CR, Amatya DM, et al. 2014. Hydrologic connectivity between geographically isolated wetlands and surface water systems: a review of select modeling methods. *Environ Model Softw* **53**: 190-206.

Guo X, Pomeroy JW, Fang X, et al. 2012. Effects of classification approaches on CRHM model performance. *Remote Sens Lett* **3**: 39-47

Harbaugh AW. 2005. MODFLOW-2005, the US Geological Survey modular ground-water model: The ground-water flow process. U.S. Geological Survey Techniques and Methods 6-A16.

Hsieh PA, Wingle W, and Healy RW. 2000. VS2DI: A graphical software package for simulating fluid flow and solute or energy transport in variably saturated porous media. US Geological Survey Water-Resources Investigations Report 99-4130.

Hsieh PA. 2001. Topdrive and Particleflow: Two computer models for simulation and visualization of ground-water flow and transport of fluid

particles in two dimensions. US Geological Survey Open-File Report 01-286.

Jencso KG, McGlynn BL, Gooseff MN, et al. 2009. Hydrologic connectivity between landscapes and streams: Transferring reach- and plot-scale understanding to the catchment scale. *Water Resour Res* **45**: W04428, doi:10.1029/2008WR007225.

Johnson CW, Werner B, Guntenspergen GR, et al. 2010. Prairie Wetland Complexes as Landscape Functional Units in a Changing Climate. *BioScience* **60**: 128-140.

Jones JE and Woodward CS. 2001. Newton–Krylov-multigrid solvers for large-scale, highly heterogeneous, variably saturated flow problems. *Adv Water Resour* **24**: 763-74.

Kite G. 1998. Manual for the SLURP hydrological model. National Hydrology Research Institute, Saskatoon, Canada.

Kollet SJ and Maxwell MR. 2006. Integrated surface-groundwater flow modeling: A free-surface overland flow boundary condition in a parallel groundwater flow model. *Adv Water Resour* **29**: 945-958.

Liu G and Schwartz FW. 2011. An integrated observational and model-based analysis of the hydrologic response of prairie pothole systems to variability in climate. *Water Resour Res* **47**: W02504.

Lane, S. N. and Reaney, S. M. and Heathwaite, A. L. 2009. Representation of landscape hydrological connectivity using a topographically driven surface flow index. *Water Resour Res* **45**: W0842.

Markstrom SL, Niswonger RG, Regan RS, et al. 2008. GSFLOW-coupled Ground-water and Surface-water Flow Model Based on the Integration of the Precipitation-runoff Modeling System (PRMS) and the Modular Ground-water Flow Model (MODFLOW-2005). U.S. Geological Survey Techniques and Methods 6-D1, 240 p.

McLaughlin DL, Kaplan DA and Cohen MJ. 2014. A significant nexus: Geographically isolated wetlands influence landscape hydrology. *Water Resour Res* **50**: doi:10.1002/2013WR015002.

Mekonnen BA, Mazurek KA, and Putz G. 2016. Incorporating landscape depression heterogeneity into the Soil and Water Assessment Tool (SWAT) using a probability distribution. *Hydrol Process*, doi: 10.1002/hyp.10800.

Neitsch SL, Arnold JG, Kiniry JR, et al. 2005. Soil and Water Assessment Tool: Theoretical Documentation, Version 2005. Grassland, Soil and Water Research Center, Agricultural Research Service and Blackland Research Center, Texas Agricultural Experiment Station, Temple, Texas.

Pomeroy J, Fang X, Westbrook C, et al. 2010. Prairie Hydrological Model Study Final Report *Centre for Hydrology Report No. 7* Centre for

Hydrology, University of Saskatchewan, Saskatoon.

Reaney SM, Bracken LJ, and Kirkby MJ. 2007. Use of the connectivity of runoff model (CRUM) to investigate the influence of storm characteristics on runoff generation and connectivity in semi-arid areas. *Hydrol Process* **21**, 894-906.

Reaney SM. 2008. The use of agent-based modelling techniques in hydrology: determining the spatial and temporal origin of channel flow in semi-arid catchments. *Earth Surf Process Landf* **33**: 317-327.

Refsgaard JC and Storm B. 1995. MIKE SHE. In: Singh, V.P. (Ed.). *Computer Models of Watershed Hydrology*. Water Resources Publications, Colorado, USA.

Shook KR and Pomeroy JW. 2011. Memory effects of depression storage in Northern Prairie hydrology. *Hydrol Process* **25**: 3890-3898.

Shook KR, Pomeroy JW, Spence C, et al. 2013. Storage dynamics simulations in prairie wetland hydrology models: evaluation and parameterization. *Hydrol Process* **27**: 1875-1889.

Simunek J, van Genuchten MT, and Sejna M. 2006. *The HYDRUS Software Package for Simulating Two- and Three-dimensional Movement of Water, Heat, and Multiple Solutes Variably-Saturated Media: Technical Manual*. Version 1.0. PC-Progress, Prague, Czech Republic.

Skaggs RW. 1978. *A Water Management Model for Shallow Water Table Soils*. Report No. 134. Water Res. Res. Inst. of The Univ. of North Carolina, NC State Univ., Raleigh, NC.

Smith T, Marshall L, McGlynn B, et al. 2013. Using field data to inform and evaluate a new model of catchment hydrologic connectivity. *Water Resour Res* **49**: 6834-6846.

Su M, Stolte WJ, and Van Der Kamp G. 2000. Modelling Canadian prairie wetland hydrology using a semi-distributed stream-flow model. *Hydrol Process* **14**: 2405-2422.

Therrien R, McLaren R, Sudicky E, et al. 2008. *HydroGeoSphere: A three-dimensional numerical model describing fully-integrated subsurface and surface flow and solute transport*. Groundwater Simul. Group, Waterloo, Ont., Canada.

Vining KC. 2002. *Simulation of Streamflow and Wetland Storage, Starkweather Coulee Subbasin, North Dakota, Water Years 1981-98*. US Geological Survey Water Resources Investigations Report 02-4113.

Viger RJ, Hay LE, Jones JW, et al. 2010. *Effects of including surface depressions in the application of the Precipitation-Runoff Modeling System in the Upper Flint River Basin, Georgia*. US Geological Survey Scientific Investigations Report 2010-5062.

Wang X, Shang S, Qu Z, et al. 2010. Simulated wetland conservation-restoration effects on water quantity and quality at watershed scale. *J Environ Manage* **91**: 1511-1525.

Wang X, Yang W, and Melesse AM, 2008. Using hydrologic equivalent wetland concept within SWAT to estimate streamflow in watersheds with numerous wetlands. *Trans ASABE* **51**: 55-72.

Williams JR and Izaurralde RC. 2005. The APEX model. BREC Report No. 2005-02. Temple, Tex.: Texas A&M University, Texas, Agricultural Experiment Station, Blackland Research and Extension Center.

Williams JR and Izaurralde RC. 2006. The APEX model. In *Watershed Models*, 437-482. V. P. Singh and D. K. Frevert, eds. Boca Raton, Fla.: CRC Press.

Williams JR, Izaurralde RC, and Steglich EM. 2008. Agricultural Policy/Environmental Extender model: Theoretical Documentation. Version 0604. BREC Report 2008-17. Temple, Tex.: Texas A&M University, Texas AgriLIFE Research, Blackland Research and Extension Center.

Yu Z and Schwartz FW. 1998. Application of an integrated basin-scale hydrologic model to simulate surface-water and ground-water interactions. *J Am Water Resour Assoc* **4**: 409-425.
